# Supplementary material
Source: Springer Nature journal article supplement (https://www.springermedizin.de/resource/supplementary/13256_2011_2018_MOESM2_ESM.pdf/9649718)

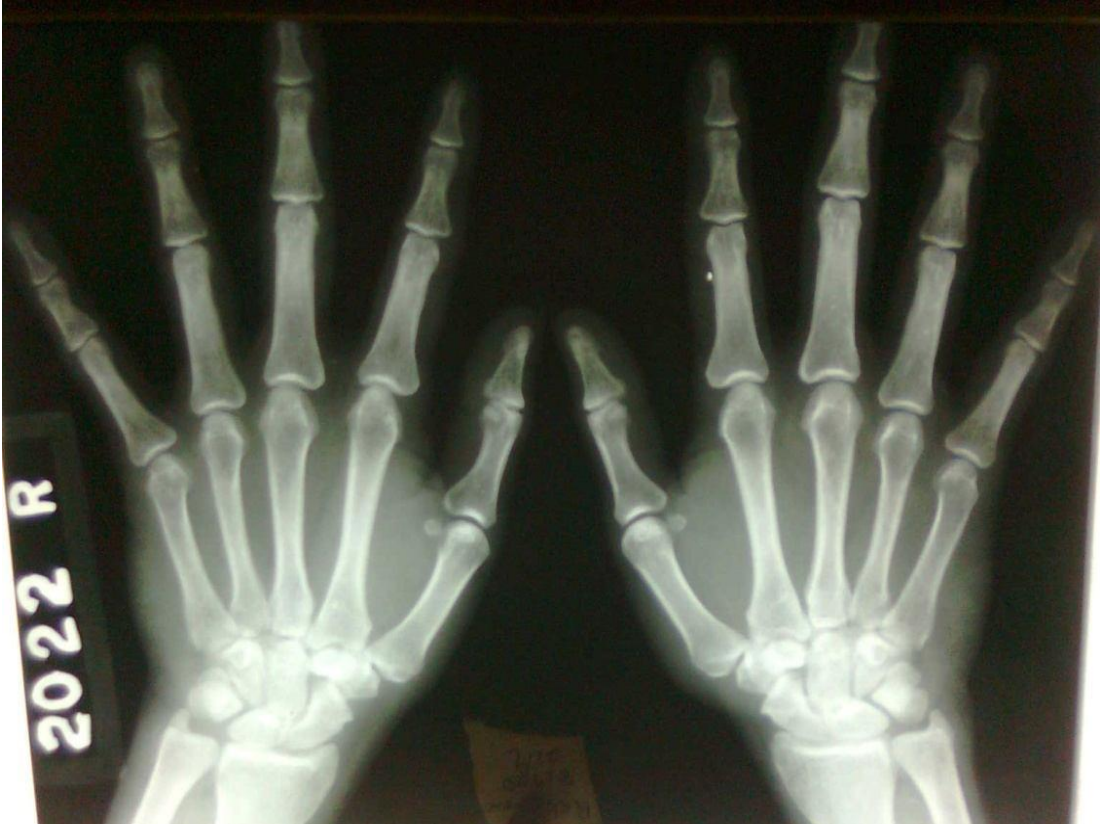

Supplement: MOESM2 [file 9649718]
